# Supplementary material for: Regulation of glycine metabolism by the glycine cleavage system and conjugation pathway in mouse models of non‐ketotic hyperglycinemia
Source: PubMed Central journal article supplement (PMC8436753; doi:10.1002/jimd.12295), 2020-08-11
Supplement: JIMD-43-1186-s002.pdf [file JIMD-43-1186-s002.pdf]

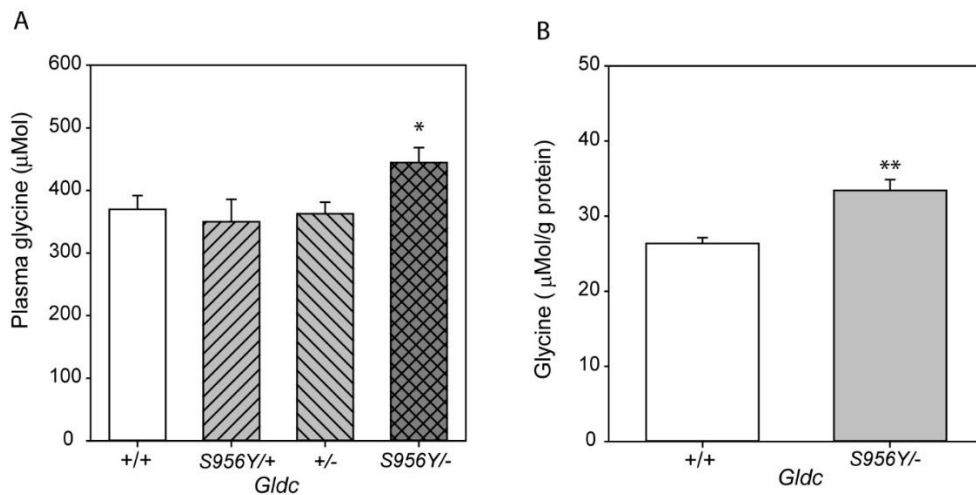

**Supplementary Fig. 1 Elevated glycine concentration in plasma and brain of adult *Gldc*<sup>S956Y/-</sup> mice.**

(A) Plasma glycine in *Gldc*<sup>+/+</sup> (n = 6), *Gldc*<sup>S956Y/+</sup> (n = 2), *Gldc*<sup>S956Y/+</sup> (n = 5) and *Gldc*<sup>S956Y/-</sup> (n = 8). Note the significant elevation of glycine concentration in *Gldc*<sup>S956Y/-</sup> plasma. (B) Brain glycine shows moderate (1.3 fold) but significant accumulation in *Gldc*<sup>S956Y/-</sup> mice (n = 8) compared with wild-type (n = 4) littermates at 6 weeks of age (significant difference compared with wild-type \*\*p<0.005 t-test; \*P<0.05 ANOVA).

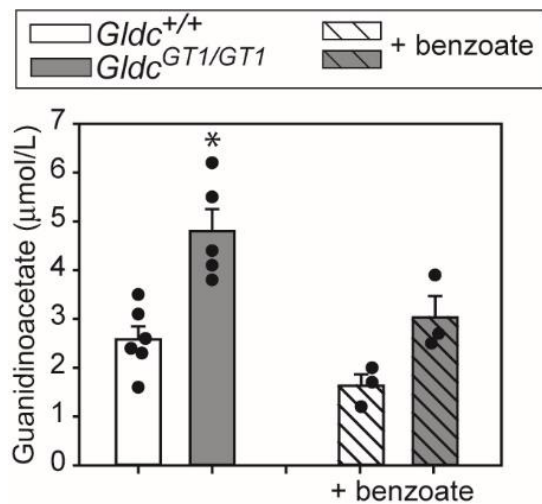

**Supplementary Fig. 2. Plasma guanidinoacetate concentration after benzoate treatment**

Plasma guanidinoacetate concentration is lowered by oral administration of benzoate for 7 days (\* p<0.05, different from treated *Gldc*<sup>GT1/GT1</sup>). Data for untreated mice are duplicated from Fig. 2P; these mice were maintained and analysed in parallel.

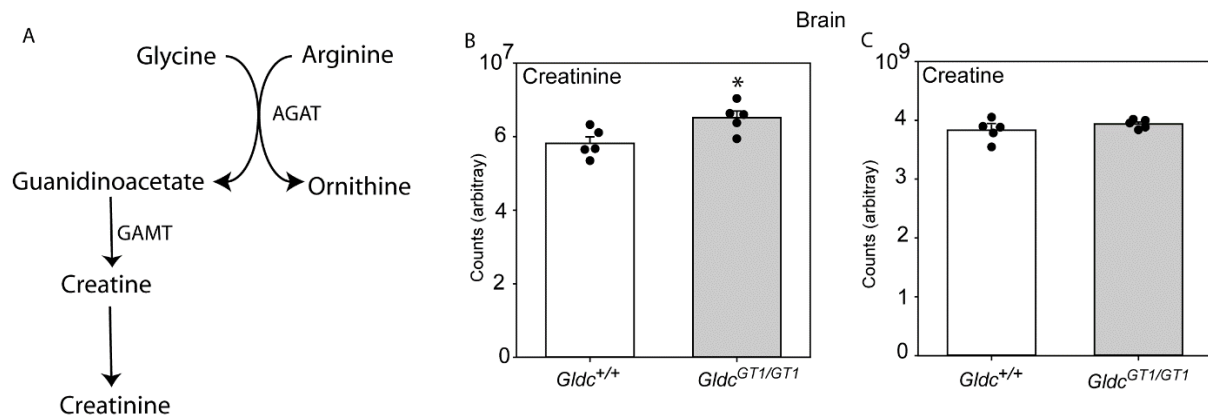

**Supplementary Fig. 3. Creatinine and creatine abundance in brain of adult *Gldc*-deficient mice.** (A) Guanidinoacetate is generated by the action of L-Arginine:glycine amidinotransferase (AGAT) and is a precursor in production of creatine (mediated by guanidinoacetate methyltransferase; GAMT) and creatinine. (B) Creatinine shows mild but significant increase in abundance in the brain of adult *Gldc*<sup>GT1/GT1</sup> mice compared with wildtypes, whereas (C) creatine did not differ between genotypes (significant difference compared with wild-type \* $p < 0.05$  t-test).
